# Supplementary material for: Suppression of lncRNA OIP5‐AS1 Attenuates Apoptosis and Inflammation, and Promotes Proliferation by Mediating miR‐25‐3p Expression in Lipopolysaccharide‐Induced Myocardial Injury
Source: Hindawi journal article supplement (doi:10.1155/2023/3154223), 2023-01-01
Supplement: f1 [file 3154223.f1.zip › Supplementary Description.docx]

**Supplementary Description**

Figure S1. The morphology of H9C2 cells
