# Supplementary figures and images for: Suppression of lncRNA OIP5‐AS1 Attenuates Apoptosis and Inflammation, and Promotes Proliferation by Mediating miR‐25‐3p Expression in Lipopolysaccharide‐Induced Myocardial Injury
Source: Hindawi journal article supplement (doi:10.1155/2023/3154223), 2023-01-01

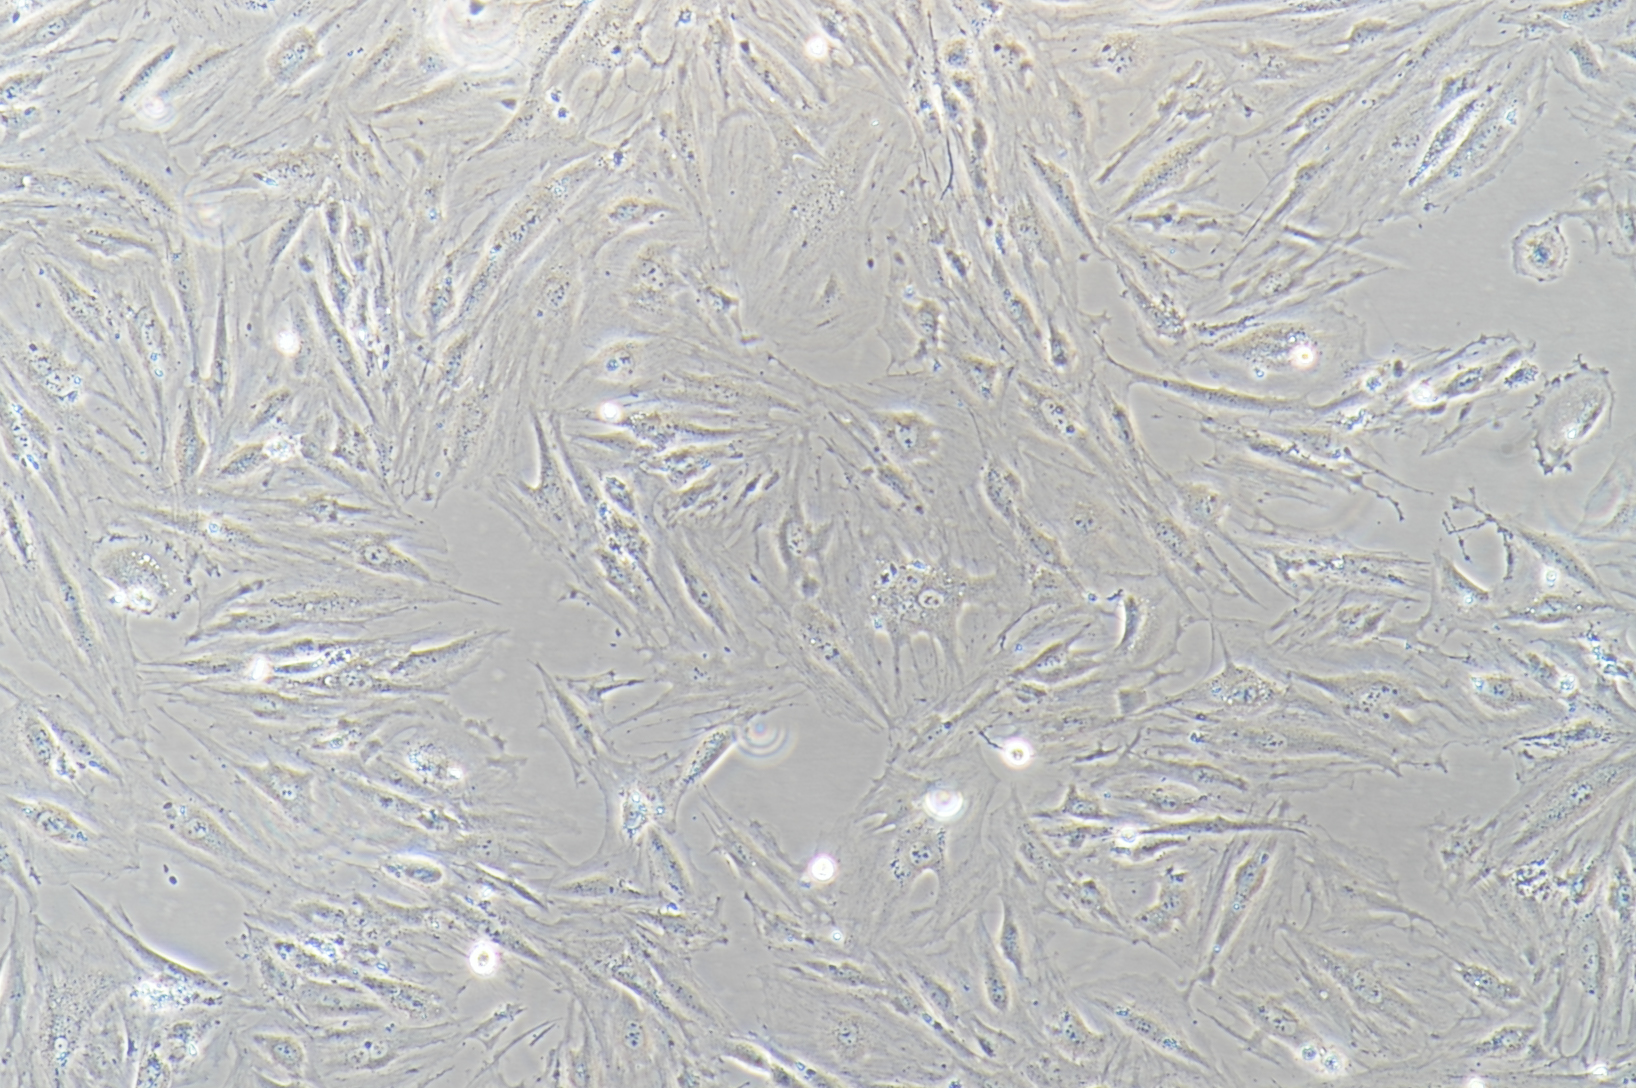

Supplement: f1 [file 3154223.f1.zip › figure S1.jpg]
